# 1 Correlations between stochastic endemic infection in multiple 2 interacting subpopulations

3 Sophie R Meakin<sup>1\*</sup> and Matt J Keeling<sup>2</sup>

4 <sup>1</sup>EPSRC & MRC Centre for Doctoral Training in Mathematics for Real-World Systems,  
5 University of Warwick

6 <sup>2</sup>Zeeman Institute: SBIDER, Mathematics Institute and School of Life Sciences, University of  
7 Warwick

8 \*Corresponding author: [s.meakin@warwick.ac.uk](mailto:s.meakin@warwick.ac.uk)

## 9 Abstract

10 Heterogeneity plays an important role in the emergence, persistence and control of  
11 infectious diseases. Metapopulation models are often used to describe spatial hetero-  
12 geneity, and the transition from random- to heterogeneous-mixing is made by incor-  
13 porating the interaction, or coupling, within and between subpopulations. However,  
14 such couplings are difficult to measure explicitly; instead, their action through the cor-  
15 relations between subpopulations is often all that can be observed. We use moment-  
16 closure methods to investigate how the coupling and resulting correlation are related,  
17 considering systems of multiple identical interacting populations on highly symmetric  
18 complex networks: the complete network, the  $k$ -regular tree network, and the star  
19 network. We show that the correlation between the prevalence of infection takes a  
20 relatively simple form and can be written in terms of the coupling, network param-  
21 eters and epidemiological parameters only. These results provide insight into the effect  
22 of metapopulation network structure on endemic disease dynamics, and suggest that  
23 detailed case-reporting data alone may be sufficient to infer the strength of between  
24 population interaction and hence lead to more accurate mathematical descriptions of  
25 infectious disease behaviour.

26 **Keywords:** mathematical epidemiology, metapopulation, networks, moment closure ap-  
27 proximation, coupling

## 28 1 Introduction

29 Heterogeneity is an increasingly important feature of epidemiological models, with spatial  
30 structure (Grenfell and Bolker, 1998; Xia et al., 2004; Viboud et al., 2006), risk structure  
31 (Baguelin et al., 2010; Datta et al., 2018; Rock et al., 2018) and age structure (Schenzle,

32 1984; Keeling and Grenfell, 1997; Keeling and White, 2010) widely considered. The incor-  
33 poration of various forms of heterogeneity is crucial to capture many important observed  
34 epidemiological dynamics, such as: clustering of cases, either spatially or in high-risk de-  
35 mographics (Schenzle, 1984); unexpected endemic behaviour, as heterogeneity breaks down  
36 the simple formulation of the basic reproduction number (Keeling and Rohani, 2008); and  
37 persistence, where heterogeneity generally acts to increase persistence (Keeling, 2000; Ha-  
38 genaars et al., 2004). Heterogeneity also has a marked influence on the control of infectious  
39 diseases, as a result of increased persistence or driven by targeted interventions (Keeling  
40 and White, 2010; Christley et al., 2005; Wallinga et al., 2010).

41 One modelling framework that can capture multiple forms of heterogeneity is the  
42 metapopulation-type model (Gilpin and Hanski, 1991; Hanski, 1998; Hanski and Gag-  
43 giotti, 2004), whereby the population is divided into multiple interacting, or ‘coupled’,  
44 subpopulations, and where within-population interactions typically occur at a higher rate  
45 than between-population interactions. Metapopulation models usually describe spatially  
46 distributed communities, but could also represent risk groups (e.g. high and low risk) or  
47 age groups (e.g. adults and children).

48 Quantifying between-population interactions is one of the key challenges of metapopu-  
49 lation infectious disease modelling (Ball et al., 2014). The individual-level behaviour that  
50 determines such interactions is highly complex and is dependent on social, cultural, envi-  
51 ronmental and economic factors (Wesolowski et al., 2015). Even with access to good data  
52 on relevant interactions, it is unclear how this should translate into a single phenomeno-  
53 logical transmission parameter; current approaches to spatially structured metapopulation  
54 models typically combine theoretical models of human mobility with highly detailed data.  
55 Models of human mobility characterise the distribution of contacts between populations  
56 based on the population sizes and the distances between them (Hanski, 1998). The gravity  
57 model, originally formulated for transportation analysis (Erlander and Stewart, 1990), and  
58 later modified for infectious disease modelling, has been widely used in combination with  
59 commuter mobility data (Viboud et al., 2006; Balcan et al., 2009), mobile phone data,  
60 used as a proxy for human mobility (Tizzoni et al., 2014; Wesolowski et al., 2015; Kraemer  
61 et al., 2016), or spatiotemporal time series of disease incidence, where coupling parameters  
62 are estimated so that simulated epidemics match observed case numbers (Xia et al., 2004).  
63 However, good data on relevant movements between populations are rare, particularly in  
64 developing countries where epidemiological models are more likely to be applied. The  
65 parameter-free radiation model (Simini et al., 2012) and variants thereof (Yan et al., 2014;  
66 Kang et al., 2015) offer alternative models for human mobility that only requires the spatial  
67 distribution of the population to estimate coupling. However, comparisons between both  
68 the gravity and radiation models, and mobile call data records show that these models fail  
69 to fully describe human mobility outside of high-income countries, such as in Sub-Saharan  
70 Africa (Wesolowski et al., 2015).

71 The interaction between subpopulations is often represented as a matrix of transmission  
72 rates, where diagonal elements represent within-population rates and off-diagonal elements

73 represent between-population rates. When considering  $P$  populations, this matrix has  $P^2$   
74 elements, which leads to unidentifiability problems if attempting to estimate parameters  
75 from endemic equilibria. On the other hand, in a stochastic system, the  $\frac{1}{2}P(P-1)$  pairwise  
76 correlations between the levels of infection in pairs of populations may help to mitigate  
77 this unidentifiability, particularly if the transmission matrix is sparse or can be assumed  
78 to have some sort of symmetry. Long-term data on disease incidence is more frequently  
79 available (Olsen and Schaffer, 1990; Grenfell and Harwood, 1997), from which we can esti-  
80 mate the correlation between epidemics in distinct subpopulations; then, given an analytic  
81 relationship between the coupling and the correlation, we can infer interaction parameters.

82 Whilst computer simulations are commonly used and clearly useful, analytic results  
83 allow us to develop intuition about the infection dynamics; however, exact analysis of  
84 stochastic epidemiological models is often mathematically intractable, due to the nonlin-  
85 earity of the transmission process. In such cases, approximation methods may be used to  
86 derive results about the expected behaviour and variability of the infection process. One  
87 such approximation method is a moment closure approximation, whereby the stochastic  
88 system is approximated by a deterministic system of differential equations for the moments  
89 (mean, variance, covariance, etc.). The most commonly used moment closure approxima-  
90 tion, and the one used throughout this paper, is the multivariate normal approximation,  
91 which assumes that third-order cumulants and higher are equal to zero or, equivalently,  
92 that the distribution of states follows a multivariate normal (MVN) distribution (Whittle,  
93 1957).

94 In this paper we derive an approximation for the correlation between the level of infec-  
95 tion in two subpopulations as a function of the coupling between them. Our results extend  
96 the analysis of Meakin and Keeling (2018) for a simple two subpopulation system. Using  
97 a multivariate normal approximation we derive results for subpopulations arranged on the  
98 complete network, the  $k$ -regular tree network and the star network. We also numerically  
99 validate our model by comparing our analytic approximations to stochastic simulations.  
100 These results also provide some insight into the effect of metapopulation network structure  
101 on network correlations.

## 102 **2 Methods**

### 103 **2.1 A stochastic endemic infection model for interacting populations on** 104 **a general graph**

105 We begin by introducing a simple stochastic *SIR* model in a population of size  $N$ , with  
106 births, deaths, transmission and recovery. At any time  $t \in [0, \infty)$ , individuals are in one of  
107 three states: susceptible, infected or recovered. A given susceptible individual meets other  
108 individuals at rate  $m > 0$ . We assume that these encounters are sufficiently close that if the  
109 other individual is infected, then transmission of infection occurs with probability  $\tau$  and the  
110 susceptible individual immediately becomes infected and infectious to others. We therefore

111 define the transmission rate be  $\beta = m\tau$ . Susceptible individuals can also succumb to  
112 infection independent of contact with infected individuals in the modelled populations; this  
113 occurs at rate  $\epsilon > 0$ , the external import rate. Infected individuals recover from infection  
114 at rate  $\gamma > 0$ , after which they become immune to further infection. Susceptible, infected  
115 and recovered individuals all die at rate  $\mu > 0$ , independent of infection status; we assume  
116 that a death is immediately followed by the birth of a susceptible individual, and hence the  
117 total population size remains constant. The basic reproductive ratio, the expected number  
118 of secondary cases produced by a single infectious individual in a susceptible population,  
119 for this process is  $R_0 = \beta/(\gamma + \mu)$ .

120 We extend the above model to  $P$  identical populations of size  $N$ . The assumption that  
121 the population sizes are equal is for mathematical tractability; a discussion of the effects of  
122 relaxing this assumption for  $P = 2$  can be found in Meakin and Keeling (2018). Each popu-  
123 lation exhibits the same population dynamics as described above, plus pairwise interaction  
124 between the populations: we assume that in population  $i$ , a proportion  $\sigma_{ij} \in [0, 1]$  of an  
125 individual's contacts are with individuals in population  $j$ . We insist that  $\sum_j \sigma_{ij} = 1$  and  
126 so  $\sigma_{ii} = 1 - \sum_j \sigma_{ij}$ . The matrix  $\Sigma = (\sigma_{ij})$  therefore describes the interaction or 'coupling'  
127 between all possible pairs of populations, and the force of infection in each subpopulation  
128 depends on the number of infected individuals in all other subpopulations. Changing  $\Sigma$   
129 does not change the basic reproductive ratio, but instead determines the distribution of  
130 secondary cases between the  $P$  subpopulations.

131 We let  $S_i(t), I_i(t), R_i(t) \in \{0, 1, 2, \dots\}$  denote the number of susceptible, infected and  
132 recovered individuals, respectively, in population  $i = 1, 2, \dots, P$  at time  $t \geq 0$ . As the popu-  
133 lation size  $N$  is constant then  $S_i(t) + I_i(t) + R_i(t) = N, \forall t \geq 0, i = 1, 2, \dots, P$ . The transition  
134 rates for the resulting  $2P$ -dimensional Markov chain from state  $(s_1, i_1, s_2, i_2, \dots, s_P, i_P)$  at  
135 time  $t$  are summarised in Table 1.

136 The metapopulation structure can be described by a weighted network  $G = (V, E)$   
137 with vertex set  $V = \{1, 2, \dots, P\}$  and edge set  $E$ , where edge  $e = ij$  has weight  $\sigma_{ij}$ : the  
138 coupling matrix  $\Sigma$  therefore represents the weighted adjacency matrix for the graph  $G$ .  
139 For mathematical tractability we restrict our analysis to networks for which we can derive  
140 analytic results, namely graphs that are highly symmetric; a discussion of the effect of  
141 relaxing this assumption is provided in the Supplementary Information. In the following  
142 analysis we consider the complete network, the  $k$ -regular tree network and the star network.  
143 In addition, we assume that  $\sigma_{ij} = \sigma, \forall ij \in E$ . We note that for  $k$ -regular tree network and  
144 the star network, the weighted adjacency matrix  $\Sigma$  is sparse, that is, most of the elements  
145 are zero.

## 146 2.2 Moment closure approximations

147 Even with constraints on the metapopulation network structure and the coupling matrix  
148  $\Sigma$ , an exact analysis of the full stochastic model is mathematically intractable. Instead we  
149 consider the approximate behaviour of the first- and second-order central moments of the

| Population           | Event              | Transition                                         | Rate                                                  |
|----------------------|--------------------|----------------------------------------------------|-------------------------------------------------------|
| $j = 1, 2, \dots, P$ | Infection          | $s_j \rightarrow s_j - 1, i_j \rightarrow i_j + 1$ | $\beta s_j \sum_l \sigma_{jl} i_l / N + \epsilon s_j$ |
|                      | Recovery           | $i_j \rightarrow i_j - 1, r_j \rightarrow r_j + 1$ | $\gamma i_j$                                          |
|                      | Death of infected  | $s_j \rightarrow s_j + 1, i_1 \rightarrow i_1 - 1$ | $\mu i_j$                                             |
|                      | Death of recovered | $s_j \rightarrow s_j + 1, r_j \rightarrow r_j - 1$ | $\mu(N - s_j - i_j)$                                  |

**Table 1.** A summary of the transition rates of the  $2P$ -dimensional Markov chain endemic infection model  $\{(S_j(t), I_j(t))_{j=1}^P : t \geq 0\}$  from state  $(s_1, i_1, s_2, i_2, \dots, s_P, i_P)$  with birth/death rate  $\mu > 0$ , contact rate  $\beta > 0$ , external import rate  $\epsilon > 0$ , recovery rate  $\gamma > 0$  and coupling matrix  $\Sigma$ .

150 process. The ODE for  $\mathbb{E}[X]$  can be calculated from first principles using:

$$\frac{d\mathbb{E}[X]}{dt} = \sum_{events} \text{rate of event} \times \text{change in } X \text{ due to event.} \quad (1)$$

151 Alternatively, these ODEs can be derived from the Kolmogorov forward equation; details  
 152 of this method can be found in existing literature on moment closure approximations in  
 153 infectious disease modelling (Keeling and Rohani, 2002; Lloyd, 2004).

154 Due to the nonlinearity of the infection term in the model, the ODE for an  $n$ th-order  
 155 moment will depend on one or more  $(n+1)$ th order moments: to fully describe the stochas-  
 156 tic process would therefore require an infinite set of ODEs. To circumvent this problem,  
 157 we use a moment closure approximation, which truncates the set of ODEs at some order.  
 158 Throughout this paper, we use a second-order moment closure approximation, which as-  
 159 sumes that third- and higher-order cumulants are equal to zero. As a result, third- and  
 160 higher-order moments can be written in terms of the means, variances and covariances  
 161 only.

162 Throughout this paper we will use the following notation for the first- and second-order  
 163 central moments:

$$\begin{aligned} \bar{S}_j &= \mathbb{E}[S_j] \\ \bar{I}_j &= \mathbb{E}[I_j] \\ C_{S_j S_j} &= \text{Cov}(S_j, S_j) = \text{Var}(S_j) \\ C_{I_j I_j} &= \text{Cov}(I_j, I_j) = \text{Var}(I_j) \\ C_{S_j I_j} &= \text{Cov}(S_j, I_j) \\ \hat{C}_{S_j S_k} &= \text{Cov}(S_j, S_k) \\ \hat{C}_{I_j I_k} &= \text{Cov}(I_j, I_k) \\ \hat{C}_{S_j I_k} &= \text{Cov}(S_j, I_k). \end{aligned}$$

164 For a metapopulation network on  $P$  populations, the set of ODEs approximating the  
165 stochastic process has at most  $3P^2 + 2P$  equations:  $P$  for each of the two first order  
166 moments and  $P^2$  for each of the three covariances. However, for the networks that we  
167 consider in this paper, symmetries in the structure of the network mean that the number  
168 of ODEs is considerably fewer. In some cases we will simplify the notation: we outline  
169 simplifications to the notation at the start of the results section for each network.

## 170 2.3 Deriving an equation for the correlation

171 In each metapopulation network (the complete network, the  $k$ -regular tree network and the  
172 star network), we derive an analytic approximation for the correlation between the number  
173 of infected individuals in a pair of populations as a function of the coupling  $\sigma$ . We define  
174 the correlation between the number of infected individuals in population  $i$  and the number  
175 of infected individuals in population  $j$  at endemic equilibrium as:

$$\rho_{ij} = \frac{\text{Cov}(I_i, I_j)}{\sqrt{\text{Var}(I_i)\text{Var}(I_j)}} = \frac{\hat{C}_{I_i I_j}}{\sqrt{C_{I_i I_i} C_{I_j I_j}}}.$$

176 We derive an approximate equation for the correlation  $\rho_{ij}$  by considering the ODE  
177 for the covariance  $\hat{C}_{I_i I_j}$  at endemic equilibrium. We then evaluate our approximation  
178 numerically, for which we need to define a set of base parameters. We utilise parameters  
179 for a highly-transmissible measles-like endemic disease in the UK (Anderson and May,  
180 1992), although we note that a full model of measles requires both seasonality (Earn et al.,  
181 2000; Rohani et al., 2002; Grenfell and Bolker, 1995) and age-structure (Schenzle, 1984;  
182 Keeling and Grenfell, 1997; Bolker, 1993). We consider the effect of both the coupling and  
183 other parameters on the correlation; we also evaluate the accuracy of our approximation  
184 by comparing our results to simulations.

## 185 3 Results

### 186 3.1 The complete network

#### 187 3.1.1 Network definition and notation

188 First we consider  $P$  identical populations on the complete network, where each population  
189 interacts with the other  $k = P - 1$  populations: a visual representation of the complete  
190 network for  $P = 3$  and  $P = 5$  populations is given in Figure 1. The coupling matrix  
191  $\Sigma = (\sigma_{ij})$  is defined as

$$\sigma_{ij} = \begin{cases} 1 - k\sigma, & \text{for } i = j \\ \sigma, & \text{for } i \neq j. \end{cases}$$

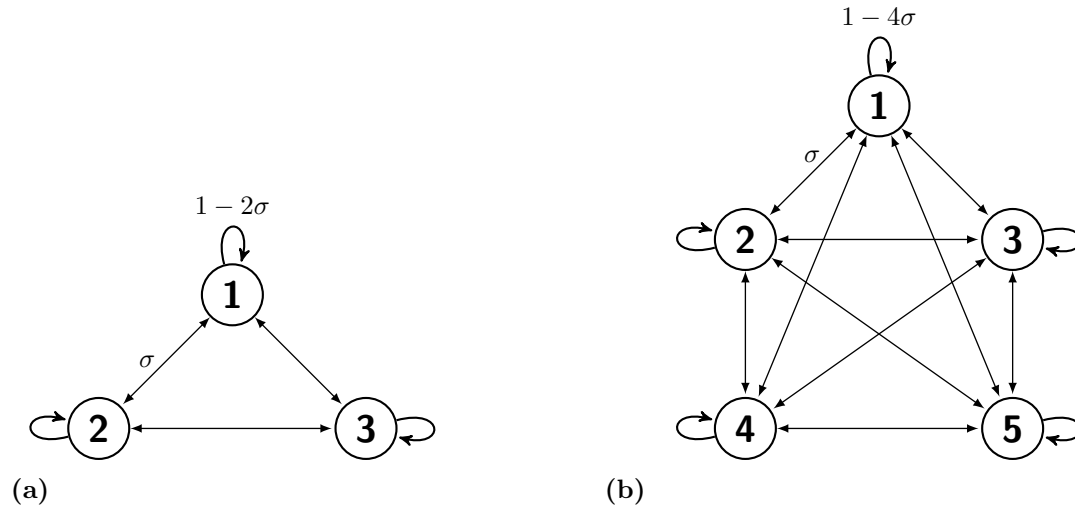

**Figure 1.** The complete network on (a)  $P = 3$  and (b)  $P = 5$  populations. The coupling between any pair of populations coupling is  $\sigma \in [0, 1/(P - 1)]$  and so the within-population coupling is  $1 - (P - 1)\sigma$ .

192

193 In the complete network metapopulation all subpopulations are epidemiologically and  
 194 spatially identical: epidemiologically in the sense that all subpopulations are of equal  
 195 size and have identical epidemiological parameters, and spatially in the sense that all  
 196 nodes are isomorphic within the network and the coupling is the same between any pair  
 197 of subpopulations. As a result, the expected behaviour is the same within all populations,  
 198 and between any pair of populations. In our notation, we can therefore drop dependency  
 199 on the population and simplify it to the following:  $\bar{X} = \mathbb{E}[X_j]$ ,  $C_{XY} = \text{Cov}(X_j, Y_j)$  and  
 200  $\hat{C}_{XY} = \text{Cov}(X_i, Y_j), i \neq j$ .

201 Using the second-order moment closure approximation, and with these simplifications,  
 202 the stochastic process on the complete network can be approximated by a set of eight ODEs:  
 203 five for the within-population moments, and three for the between-population moments.  
 204 These can be found in the Supplementary Information. We use these equations in both  
 205 the analytic and the numerical results.

### 206 3.1.2 Analytic results

207 For  $P$  populations on the complete network, we define the correlation between any pair of  
 208 populations as

$$\rho = \frac{\hat{C}_{II}^*}{C_{II}^*},$$

209 and show that this is equal to

$$\rho = \frac{\sigma}{\xi + \sigma} - \Delta, \quad (2)$$

210 where

$$\xi = \frac{N(\gamma + \mu) - \beta \bar{S}^*}{\beta \bar{S}^*} \quad (3)$$

211 and

$$\Delta = \frac{(\beta \bar{I}^* + N\epsilon) \frac{\hat{C}_{SI}^*}{C_{II}^*}}{\beta(1 - \sigma)\bar{S}^* - N(\gamma + \mu)}. \quad (4)$$

212 We derive this result by taking the moment equation for  $\hat{C}_{II}$  at equilibrium and dividing  
 213 through by  $2C_{II}^*/N$ , following the same approach as Meakin and Keeling (2018); full details  
 214 of this derivation can be found in the Supplementary Information. Moreover, if  $\Delta \ll 1$  then  
 215 we can further simplify the approximation for the correlation to the following expression:

$$\rho \approx \frac{\sigma}{\xi + \sigma}. \quad (5)$$

216 We can also use an alternative approximate expression for  $\xi$  that is independent of  
 217  $\bar{S}^*$ , which eliminates the need to find the equilibrium of the 8-dimensional ODE model.  
 218 Meakin and Keeling (2018) show that by ignoring the effects of imports and correlations  
 219 and taking the large population limit, then

$$\xi \approx \xi' = \frac{\epsilon(\gamma + \mu)}{\mu(\beta - \gamma - \mu)} = \frac{\epsilon}{\mu(R_0 - 1)}. \quad (6)$$

220 Given the simpler form of Equation (6) compared to the original expression for  $\xi$  given by  
 221 Equation (3), in remainder of the analysis we evaluate  $\sigma/(\xi' + \sigma)$  as an approximation for  
 222 the MVN correlation  $\rho$ .

223 This approximation is independent of the number of populations  $P$ . In short, this is  
 224 due to the balance between two competing influences: the addition of an extra external  
 225 coupling would normally weaken the correlation between two connected populations, but  
 226 the fact that this additional population is itself correlated with the original populations  
 227 nullifies this effect. In the Supplementary Information, we make this argument explicit by  
 228 adding a third population (with variable coupling) to an interacting pair of populations.



### 229 3.1.3 Numerical results

230 We first explore the effect of the number of subpopulations  $P$  and coupling  $\sigma$  on the  
231 equilibrium values of the first-order central moments  $\bar{S}^*$  and  $\bar{I}^*$  and the second-order central  
232 moments  $C_{II}^*$  and  $\hat{C}_{II}^*$  (Figure 2a). We consider  $P = 3, 5, 10$  and  $\sigma \in [0, 1/k]$ ,  $k = P - 1$ ,  
233 and include  $P = 2$  for comparison. These results are obtained by the numerical integration  
234 of the system of ODEs given in the Supplementary Information, and so only introduce  
235 an error due to the MVN moment closure approximation. For all values of  $P$ , all curves  
236 show a sigmoidal pattern, with  $\bar{S}^*$  and  $C_{II}^*$  decreasing with the coupling, and  $\bar{I}^*$  and  $\hat{C}_{II}^*$   
237 increasing with the coupling. As the number of populations  $P$  increases the magnitude of  
238 change in  $C_{II}^*$  increases, since reducing the within-population coupling (either by increasing  
239 the between-population coupling  $\sigma$  or increasing the number of populations  $P$ ) reduces the  
240 variance  $C_{II}$ . However, the magnitude of change in  $\hat{C}_{II}^*$  decreases, because as  $P$  increases,  
241 then the effect of interaction between a subpopulation and its neighbour is damped by the  
242 other  $P - 2$  neighbours. In the previous section we noted that our approximation for the  
243 correlation is independent of the number of populations  $P$ : we also calculate the MVN  
244 correlation  $\hat{C}_{II}^*/C_{II}^*$  (Figure 2b) and note that this also appears independent of  $P$ . The  
245 correlation follows a sigmoidal relationship, increasing from zero for very low coupling.

246 Next we compare the MVN correlation  $\rho$  (Equation (2)) and our simplified approx-  
247 imation  $\sigma/(\xi' + \sigma)$ ,  $\xi' = 0.0625$  (Equation (5)) to stochastic simulations for  $P = 3, 5$   
248 subpopulations (Figure 3). The close agreement between  $\rho$  and the simulation results sug-  
249 gests that our use of the MVN moment closure approximation is justified. There is also  
250 little difference between the MVN correlation and our approximation (that is,  $\Delta$  is small),  
251 so  $\sigma/(\xi' + \sigma)$  is a good approximation for the correlation  $\rho$ . Therefore, we can relate the  
252 phenomenological coupling parameter  $\sigma$  to the correlation between the number of infected  
253 individuals in any pair of populations for  $P$  populations arranged on the complete network  
254 by  $\rho \approx \sigma/(\xi' + \sigma)$ .

## 255 3.2 The tree network

### 256 3.2.1 Network definition and notation

257 Next, we consider infinitely many populations on a  $k$ -regular tree network, where each  
258 subpopulation has  $k$  neighbours: a visualisation of the  $k$ -regular tree network for  $k = 2$   
259 and  $k = 4$  neighbours is given in Figure 4. The coupling matrix  $\Sigma = (\sigma_{ij})$  is defined as

$$\sigma_{ij} = \begin{cases} 1 - k\sigma, & \text{for } i = j \\ \sigma, & \text{for } i, j \text{ neighbours, } i \neq j \\ 0, & \text{otherwise.} \end{cases} \quad (7)$$

260

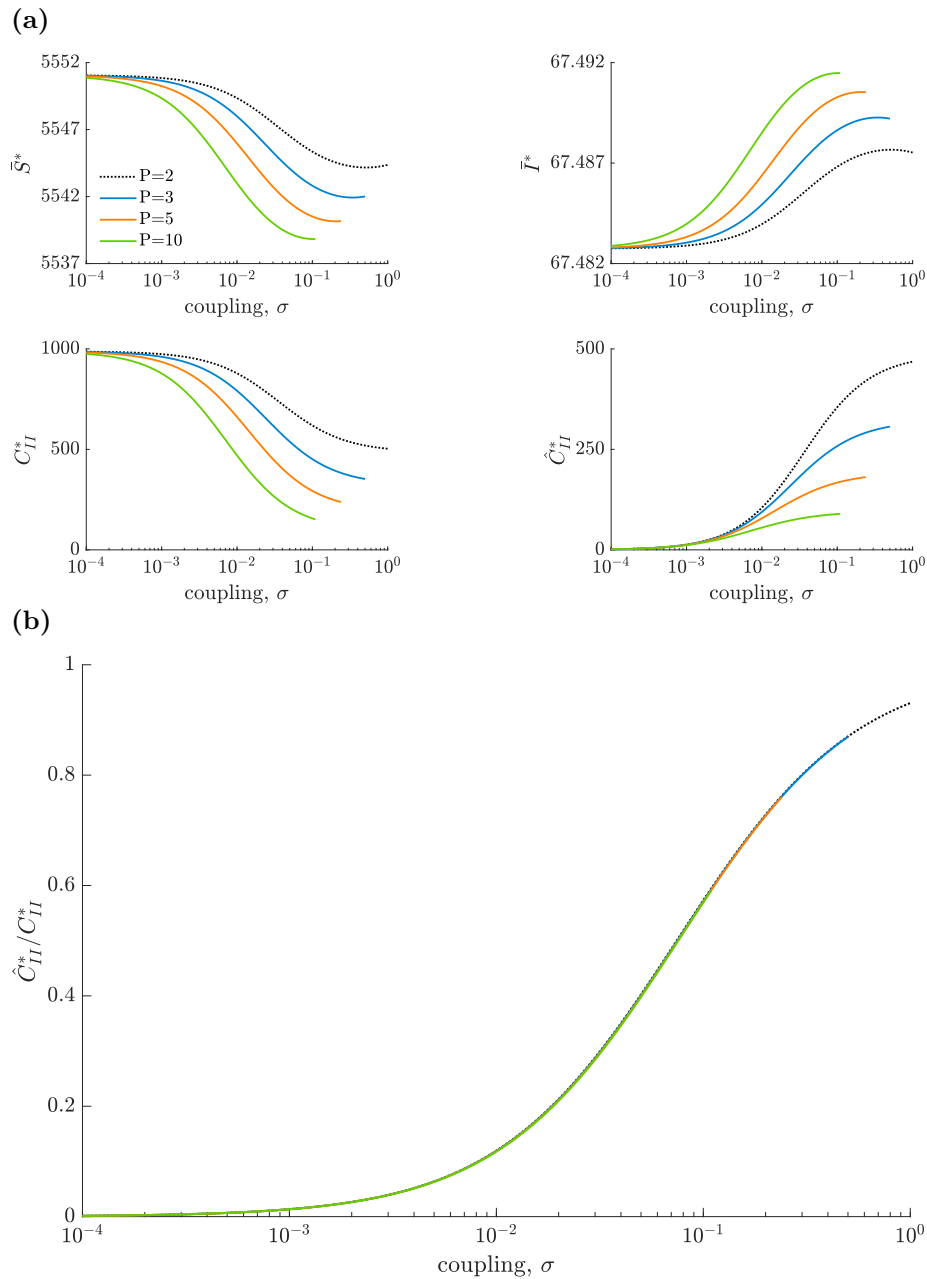

**Figure 2.** The effect of the coupling  $\sigma$  on (a) the key mean variables  $\bar{S}^*$ ,  $\bar{I}^*$ ,  $C_{II}^*$  and  $\hat{C}_{II}^*$  and (b) the correlation  $\hat{C}_{II}^*/C_{II}^*$ , for  $P$  populations arranged on the complete network. Parameter values represent a measles-like endemic disease in the UK ( $N = 10^5$ ,  $\mu = 5.5 \times 10^{-5}$ ,  $R_0 = 17$ ,  $\gamma^{-1} = 13$  and  $\epsilon = 5.5 \times 10^{-5}$ ). These values are calculated from the system of ODEs given in the Supplementary Information.

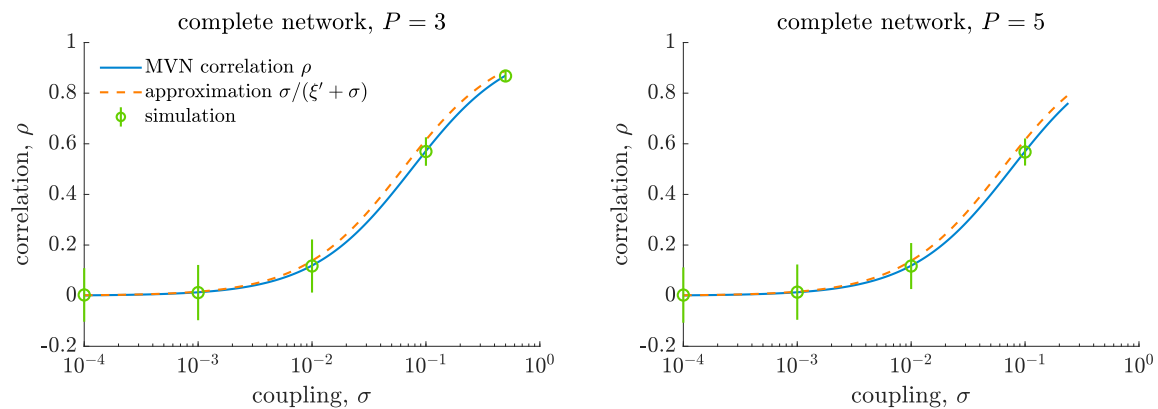

**Figure 3.** Comparing analytic and numerical correlation between any pair of populations from  $P = 3, 5$  populations arranged on the complete network. We compare the analytic correlation  $\rho$  and our approximation  $\sigma/(\xi' + \sigma)$ ,  $\xi' = 0.0625$ , to stochastic simulations for a measles-like endemic disease in the UK ( $N = 10^5$ ,  $\mu = 5.5 \times 10^{-5}$ ,  $R_0 = 17$ ,  $\gamma^{-1} = 13$  and  $\epsilon = 5.5 \times 10^{-5}$ ). Each population is coupled to the  $k = P - 1$  other populations. The between-population coupling is fixed as  $\sigma \in [0, 1/k]$  and within-population coupling is therefore  $1 - k\sigma$ . We generate 1000 realisations of the process for each value of  $\sigma$  and calculate the correlation as a time-weighted Pearson correlation coefficient for  $50 \leq t \leq 200$ ; error bars represent  $\pm 2$  standard deviations.

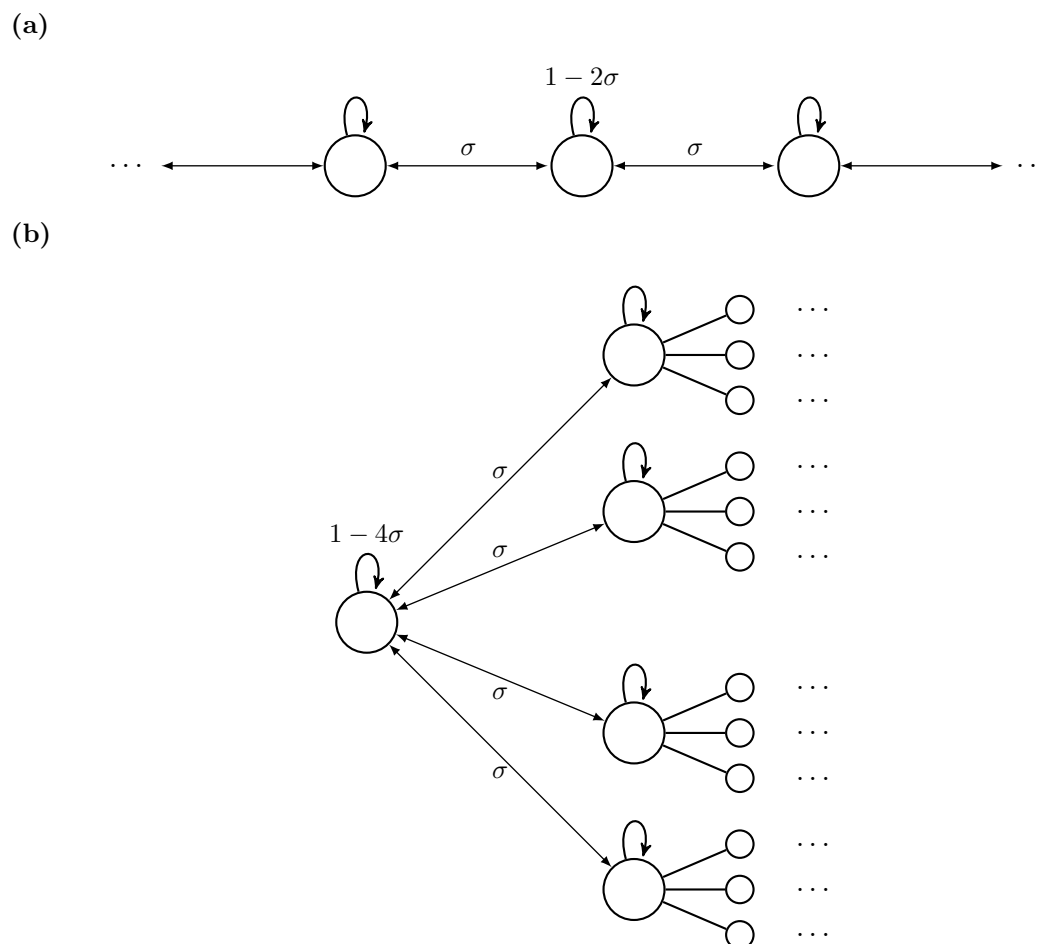

**Figure 4.** The  $k$ -regular tree network for (a)  $k = 2$  and (b)  $k = 4$  neighbours. The coupling between any pair of neighbouring populations is  $\sigma \in [0, 1/k]$  and so the within-population coupling is  $1 - k\sigma$ .

261 As with the complete network, all subpopulations in the  $k$ -regular tree network are  
262 epidemiologically and spatially identical, so the expected behaviour is the same within all  
263 subpopulations. In addition, in a tree network, there is a unique path between any pair of  
264 subpopulations, and so we can define the distance  $d_{ij} \in \mathbb{N}$  between subpopulations  $i$  and  
265  $j$  to be the length of the path between the subpopulations. For the notation for within-  
266 population moments we can again drop dependency on the subpopulation:  $\bar{X} = \mathbb{E}[X_j]$  and  
267  $C_{XY} = \text{Cov}(X_j, Y_j)$ . For the between-population moments, we only need to denote the  
268 distance  $d$  between the subpopulations:  $\hat{C}_{XY}^{(d)} = \text{Cov}(X_i, Y_j), i \neq j$ , where  $d_{ij} = d$ .

269 **Finite subgraph approximation of the  $k$ -regular tree network** We cannot per-  
270 form stochastic simulations of the infection process on infinitely many subpopulations. In  
271 addition, we can use a second-order moment closure approximation to derive a system of  
272 ODEs that approximate the stochastic process on the network, but this system comprises  
273 infinitely many equations: five equations for the within-population moments, and infinitely  
274 many equations for the between-population moments (3 for each  $d \geq 1$ ).

275 To overcome these problems, we consider a finite subgraph of the  $k$ -regular tree net-  
276 work. We define the  $D$ -truncated  $k$ -regular tree network to be the network of subpopula-  
277 tions distance less than or equal to  $D$  from some arbitrarily chosen origin node; since all  
278 subpopulations are identical and the  $k$ -regular tree network is infinite, the choice of origin  
279 node is irrelevant. The total number of subpopulations in the  $D$ -truncated  $k$ -regular tree  
280 network is

$$T = 1 + k \sum_{i=0}^{D-1} (k-1)^i. \quad (8)$$

281 We can also write down a finite set of ODEs that approximate the stochastic process on  
282 the  $D$ -truncated  $k$ -regular tree network. If  $D$  is sufficiently large, then we can make some  
283 further simplifying assumptions. First, we can assume that  $\hat{C}_{XY}^{(d)} = 0, \forall d > D$ . Secondly,  
284 we can assume that the expected behaviour of the first- and second-order central moments  
285 in the origin node, and between the origin node and subpopulations at distance  $d \ll D$   
286 will be the same as in the full  $k$ -regular tree network. In the full  $k$ -regular tree network we  
287 had that  $\hat{C}_{XY}^{(d)}$  is the same for any pair of subpopulations distance  $d$  apart: we continue to  
288 make this simplification in the truncated network. Given these assumptions, and making  
289 a second-order MVN moment closure approximation, the stochastic process on the  $D$ -  
290 truncated  $k$ -regular tree network can be approximated by a set of  $5 + 3D$  equations: five  
291 equations for the within-population moments and  $3D$  equations for the between-population  
292 moments. These can be found in the Supplementary Information.

### 293 3.2.2 Analytic results

294 We can derive analytic results for the full  $k$ -regular tree network. We define the correlation  
 295 between the number of infected individuals in a pair of subpopulations distance  $d \geq 1$   
 296 apart as

$$\rho_d = \frac{\hat{C}_{II}^{(d)*}}{C_{II}^*},$$

297 where  $\rho_0 = 1$  and  $\lim_{d \rightarrow \infty} \rho_d = 0$ . We can show that  $\rho_d$  is the solution to

$$\rho_d = \frac{\sigma}{\xi + k\sigma} (\rho_{d-1} + (k-1)\rho_{d+1}) - \Delta^{(d)}, \quad (9)$$

298 where

$$\xi = \frac{N(\gamma + \mu) - \beta \bar{S}^*}{\beta \bar{S}^*} \quad (10)$$

299 and

$$\Delta_k^{(d)} = \frac{(\beta \bar{I}^* + N\epsilon) \hat{C}_{SI}^{(d)*}}{\beta(1 - k\sigma) \bar{S}^* - N(\gamma + \mu) C_{II}^*}. \quad (11)$$

300 We derive this result from the moment equation for  $\hat{C}_{II}^{(1)}$  at equilibrium and dividing  
 301 through by  $2C_{II}^*/N$ ; full details of this derivation can be found in the Supplementary  
 302 Information. Moreover, if  $\Delta^{(d)} \ll 1, \forall d$  then  $\rho_d$  is the solution to the recurrence relation

$$(k-1)\rho_{d+1} = \frac{\xi + k\sigma}{\sigma} \rho_d - \rho_{d-1}, \quad (12)$$

303 where  $\rho_0 = 1$  and  $\lim_{d \rightarrow \infty} \rho_d = 0$ . Since  $|\rho_d| \leq 1$  then the solution is given by

$$\begin{aligned} \rho_d &= \left( \frac{k\sigma + \xi - \sqrt{\xi^2 + 2k\xi\sigma + (k-2)^2\sigma^2}}{2(k-1)\sigma} \right)^d \\ &= \left( \frac{k\sigma + \xi - \sqrt{\sigma^2 k^2 + (2\xi\sigma - 4\sigma^2)k + 4\sigma^2 + \xi^2}}{2(k-1)\sigma} \right)^d. \end{aligned} \quad (13)$$

304 We note two things: firstly, since  $\rho_1 \leq 1$  then it is trivial that  $\rho_d \rightarrow 0$  as  $d \rightarrow \infty$ .  
 305 Secondly,  $\rho_d \rightarrow 0$  as  $k \rightarrow \infty$ .

### 306 3.2.3 Numerical results

307 We note that the MVN correlation and stochastic simulations have to be performed on  
 308 the  $D$ -truncated  $k$ -regular tree network, as it is not possible to use the full  $k$ -regular tree  
 309 network. If  $D$  is sufficiently large, then these correlations will be approximately the same as  
 310 in the full  $k$ -regular tree network: we show that for  $D$  sufficiently large then the correlation  
 311 converges (Figure S2, Supplementary Information).

312 We first numerically evaluate the effect of the number of neighbouring subpopulations  
 313  $k$  and the distance  $d$  on the correlation  $\rho_d$  (Figure 5). As with the complete network,  
 314 the correlation follows a sigmoidal shape, increasing from zero correlation from very low  
 315 coupling. For fixed coupling  $\sigma$ , as the number of neighbours  $k$  increases then the correlation  
 316  $\rho_d$  decreases; similarly, for a fixed number of neighbours  $k$ , as the distance  $d$  increases then  
 317 the correlation  $\rho_d$  also decreases. This all agrees with expected behaviour from Equation  
 318 (13).

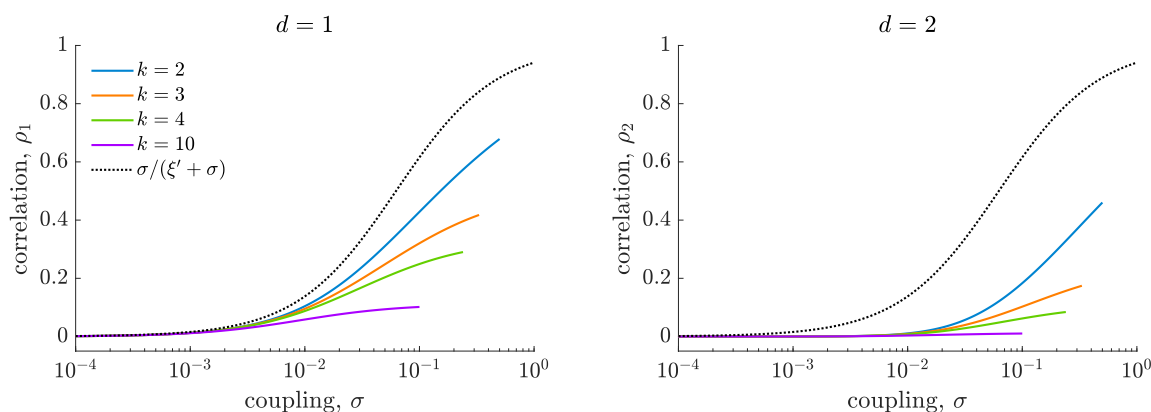

**Figure 5.** The effect of the number of neighbouring subpopulations  $k$  in the  $k$ -regular tree network on the correlation between the number of infected individuals in adjacent populations,  $\rho_1$  (left), and populations with a common neighbour,  $\rho_2$  (right). Parameter values represent a measles-like endemic disease in the UK ( $N = 10^5$ ,  $\mu = 5.5 \times 10^{-5}$ ,  $R_0 = 17$ ,  $\epsilon = 5.5 \times 10^{-5}$ ,  $\gamma = 1/13$ ). The MVN correlation is calculated on the  $D$ -truncated  $k$ -regular tree network for  $D = 50$  from the system of ODEs given in the Supplementary Information.

319 Next, we compare our approximations to the results of stochastic simulations for  $k =$   
 320  $2, 4$  (Figure 6), where stochastic simulations are performed on the  $D$ -truncated  $k$ -regular  
 321 tree network and  $D = 5, 3$  for  $k = 2, 4$ , respectively. For all combinations of  $k$  and  $d$   
 322 there is close agreement between the MVN correlation and stochastic simulations, which  
 323 justifies our use of the MVN moment closure approximation; we can show that increasing  
 324  $D$  further does not significantly change the correlations in the system (Supplementary  
 325 Information, Figure S2). There is also little difference between the MVN correlation and

326 our approximation (that is,  $\Delta^{(1)}$  is small) and so approximating the MVN correlation by Equation (13) is reasonable.

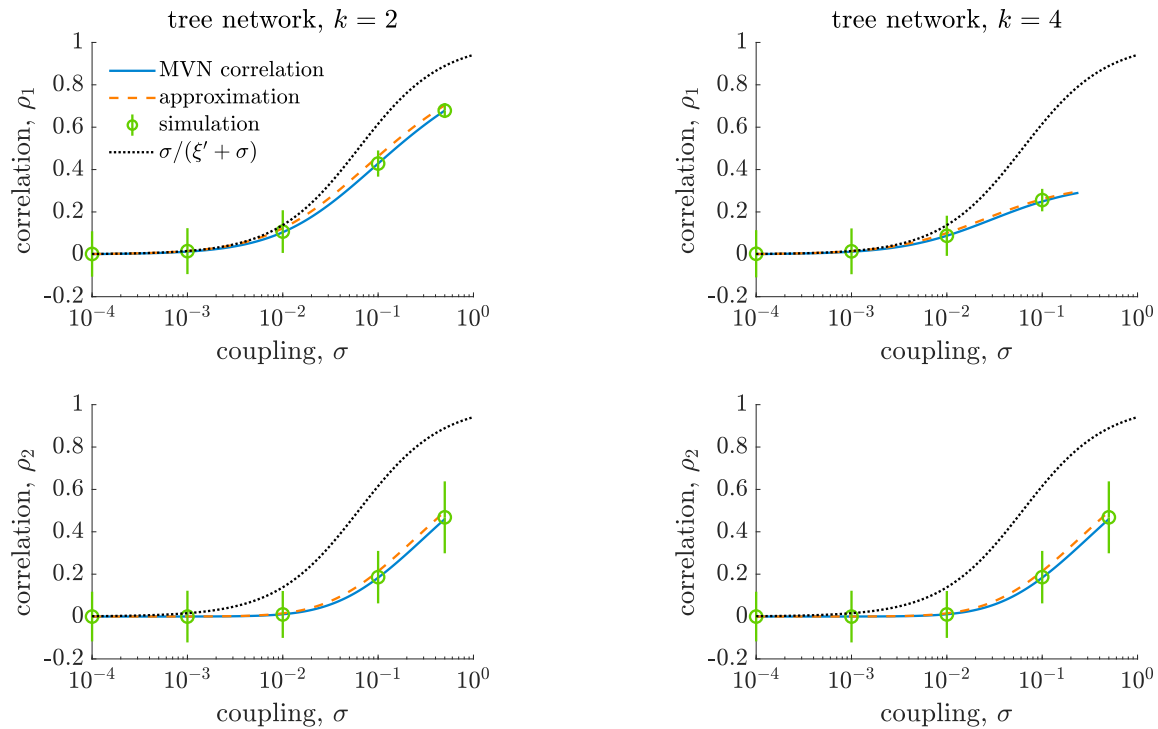

**Figure 6.** Comparing the MVN correlation  $\rho_d$  and our approximation to stochastic simulations for a measles-like endemic disease in the UK in  $T$  populations arranged on the  $D$ -truncated  $k$ -regular tree network ( $N = 10^5$ ,  $\mu = 5.5 \times 10^{-5}$ ,  $\beta = 17/13$ ,  $\epsilon = 5.5 \times 10^{-5}$ ,  $\gamma = 1/13$ ). The coupling between interacting populations is  $\sigma \in [0, 1/k]$ . The stochastic process is simulated on the  $D$ -truncated  $k$ -regular tree network, with  $D = 5$  and  $D = 3$  for  $k = 2, 4$ , respectively. The process is simulated over a 200 year period using the Gillespie algorithm, with a burn-in period of 50 years, and generate 100 realisations of the process for each value of  $\sigma$ . The correlation is calculated as a time-weighted Pearson correlation coefficient for  $50 \leq t \leq 200$ ; error bars represent  $\pm 2$  standard deviations.

327

### 328 3.3 The star network

#### 329 3.3.1 Network definition and notation

330 Finally, we consider the star network on  $P$  subpopulations, where there is a central ‘hub’  
 331 subpopulation (labelled as subpopulation 1) and  $k = P - 1$  ‘leaf’ populations; there is no  
 332 direct interaction between the leaf populations. A visualisation of the star network for



333  $P = 3$  and  $P = 5$  subpopulations is given in Figure 7. The coupling matrix  $\Sigma = (\sigma_{ij})$  is  
 334 defined as

$$\sigma_{ij} = \begin{cases} 1 - k\sigma, & \text{for } i = j = 1 \\ 1 - \sigma, & \text{for } i = j \neq 1 \\ \sigma, & \text{for } i = 1, j \neq 1 \text{ and } i \neq 1, j = 1 \\ 0, & \text{otherwise.} \end{cases} \quad (14)$$

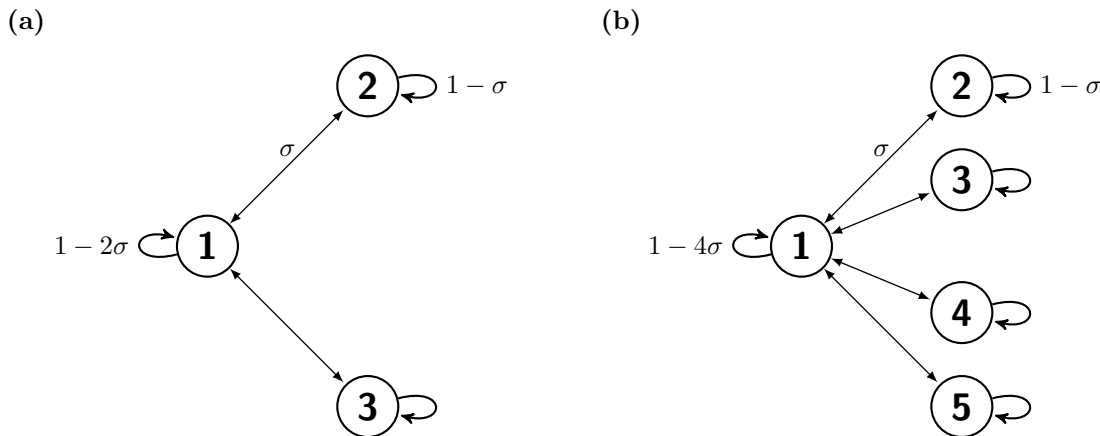

**Figure 7.** The star network on (a)  $P = 3$  and (b)  $P = 5$  populations. The coupling between any pair of neighbouring populations is  $\sigma \in [0, 1/(P - 1)]$  and so the within-population coupling is  $1 - (P - 1)\sigma$  for the hub population and  $1 - \sigma$  for any leaf population.

335 Unlike the complete network and the  $k$ -regular tree network, the expected behaviour  
 336 of the stochastic process is not the same within and between all subpopulations. This  
 337 is because the hub subpopulation has  $k$  neighbours, whereas each leaf subpopulation has  
 338 only one neighbour. However, we can still make some simplifications to the notation: the  
 339 expected behaviour of the infection process is the same within any leaf subpopulation,  
 340 or between any pair of leaf subpopulations, or between a leaf subpopulation and the hub  
 341 subpopulation. We can therefore simplify our notation to distinguish between hub and leaf  
 342 subpopulations. For the within-population moments, the superscript indicates whether the  
 343 subpopulation is a hub ( $H$ ) or a leaf ( $L$ ) subpopulation:

$$\begin{aligned} \bar{X}_H &= \mathbb{E}[X_1] \\ \bar{X}_L &= \mathbb{E}[X_i], \quad i = 2, \dots, P \\ C_{XY}^H &= \text{cov}(X_1, Y_1) \\ C_{XY}^L &= \text{cov}(X_i, Y_i), \quad i = 2, \dots, P. \end{aligned}$$

344 For the between-population moments, the superscript indicates whether one of the subpop-  
 345 ulation is a hub ( $H$ ) or if they are both leaf subpopulations ( $L$ ); for  $\hat{C}_{S_i I_j}$  we distinguish  
 346 between  $\hat{C}_{S_1 I_i}$  and  $\hat{C}_{S_i I_1}$ :

$$\begin{aligned}\hat{C}_{XX}^H &= \text{cov}(X_1, X_i), \quad i = 2, \dots, P \\ \hat{C}_{XX}^L &= \text{cov}(X_i, X_j), \quad i, j = 2, \dots, P, i \neq j \\ \hat{C}_{X_H Y_L} &= \text{cov}(X_1, Y_i), \quad i = 2, \dots, P.\end{aligned}$$

347 Using the second-order moment closure approximation, the stochastic process on the  
 348 star network for  $P$  subpopulations can be approximated by a set of seventeen ODEs:  
 349 ten equations for the within-population moments, and seven equations for the between-  
 350 population moments. These can be found in the Supplementary Information. We use these  
 351 equations in both the analytic and the numerical results.

### 352 3.3.2 Analytic results

353 For  $P$  identical subpopulations on the star network, we define the correlation between the  
 354 number of infected individuals in the hub population and the number of infected individuals  
 355 in a leaf population as

$$\rho_H = \frac{\hat{C}_{II}^{H*}}{\sqrt{C_{II}^{H*} C_{II}^{L*}}},$$

356 and the correlation between the number of infected individuals in two leaf subpopulations  
 357 as

$$\rho_L = \frac{\hat{C}_{II}^{L*}}{C_{II}^{L*}}.$$

358 We can show that  $\rho_H$  and  $\rho_L$  are solution to the following pair of simultaneous equations:

$$\rho_H = \sqrt{\frac{C_{II}^{H*}}{C_{II}^{L*}}} \frac{\sigma}{\frac{S_H^*}{S_L^*} (\xi_H + k\sigma) + \xi_L + \sigma} + \sqrt{\frac{C_{II}^{L*}}{C_{II}^{H*}}} \frac{\sigma}{\xi_H + k\sigma + \frac{S_L^*}{S_H^*} (\xi_L + \sigma)} (1 - (k-1)\rho_L) + \Delta_H \quad (15)$$

$$\rho_L = \sqrt{\frac{C_{II}^{H*}}{C_{II}^{L*}}} \frac{\sigma}{\xi_L + \sigma} \rho_H + \Delta_L, \quad (16)$$

359 where

$$\xi_H = \frac{N(\gamma + \mu) - \beta \bar{S}_H^*}{\beta \bar{S}_H^*}, \quad (17)$$

$$\xi_L = \frac{N(\gamma + \mu) - \beta \bar{S}_L^*}{\beta \bar{S}_L^*} \quad (18)$$

360 and

$$\begin{aligned} \Delta_H = & \frac{\beta(1 - k\sigma)\bar{I}_H^* + k\beta\sigma\bar{I}_L^* + N\epsilon}{2N(\gamma + \mu) - \beta(1 - k\sigma)\bar{S}_H^* - \beta(1 - \sigma)\bar{S}_L^*} \frac{\hat{C}_{SHI_L}}{\sqrt{C_{II}^{H*}C_{II}^{L*}}} \\ & + \frac{\beta(1 - \sigma)\bar{I}_L^* + \beta\sigma\bar{I}_H^* + N\epsilon}{2N(\gamma + \mu) - \beta(1 - k\sigma)\bar{S}_H^* - \beta(1 - \sigma)\bar{S}_L^*} \frac{\hat{C}_{SLI_H}}{\sqrt{C_{II}^{H*}C_{II}^{L*}}} \end{aligned} \quad (19)$$

$$\Delta_L = \frac{\beta(1 - \sigma)\bar{I}_L^* + \beta\sigma\bar{I}_H^* + N\epsilon}{N(\gamma + \mu) - \beta(1 - \sigma)\bar{S}_L^*} \frac{\hat{C}_{SI}^L}{C_{II}^L}. \quad (20)$$

361 We derive this result by taking the moment equation for  $\hat{C}_{II}^H$  and  $\hat{C}_{II}^L$  at equilibrium; full  
 362 details of this derivation can be found in the Supplementary Information. Moreover, if  
 363  $\Delta_H, \Delta_L \ll 1$  then we can further simplify this result to the following pair of simultaneous  
 364 equations:

$$\rho_H \approx \sqrt{\frac{C_{II}^{H*}}{C_{II}^{L*}}} \frac{\sigma}{\frac{S_H^*}{S_L^*}(\xi_H + k\sigma) + \xi_L + \sigma} + \sqrt{\frac{C_{II}^{L*}}{C_{II}^{H*}}} \frac{\sigma}{\xi_H + k\sigma + \frac{S_L^*}{S_H^*}(\xi_L + \sigma)} (1 - (k - 1)\rho_L) \quad (21)$$

$$\rho_L \approx \sqrt{\frac{C_{II}^{H*}}{C_{II}^{L*}}} \frac{\sigma}{\xi_L + \sigma} \rho_H. \quad (22)$$

### 365 3.3.3 Numerical results

366 We first numerically evaluate the effect of the number of leaf subpopulations  $k$  on the  
 367 correlations  $\rho_H$  and  $\rho_L$  (Figure 8). Firstly, we note that, as with the complete and tree  
 368 network, both  $\rho_H$  and  $\rho_L$  exhibit a sigmoidal shape, increasing from zero correlation from  
 369 very low coupling. Secondly, the correlation between two leaf nodes is lower than between  
 370 the hub and a leaf node; this is to be expected, as the leaf nodes are not directly connected  
 371 to each other. Finally for a given coupling  $\sigma$  as the number of neighbours  $k$  increases then  
 372 the correlation decreases; this holds for both  $\rho_H$  and  $\rho_L$ .

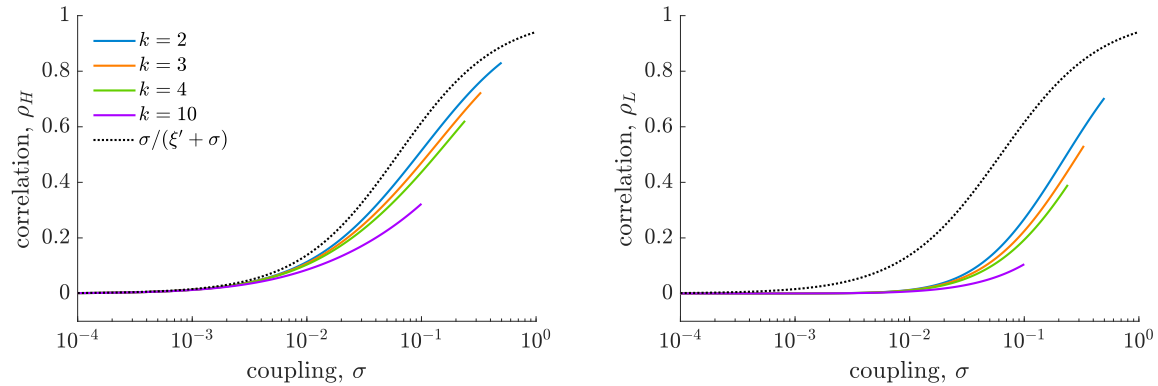

**Figure 8.** The effect of the number of leaf subpopulations  $k$  in the star network on the correlation between the number of infected individuals in the hub and a leaf population,  $\rho_H$  (left), and two leaf populations,  $\rho_L$  (right). Parameter values represent a measles-like endemic disease in the UK ( $N = 10^5$ ,  $\mu = 5.5 \times 10^{-5}$ ,  $R_0 = 17$ ,  $\epsilon = 5.5 \times 10^{-5}$ ,  $\gamma = 1/13$ ). These values are calculated from the system of ODEs given in the Supplementary Information.

373 Next, we compare the MVN correlation and our approximation to the results of stochastic  
 374 simulations (Figure 9). Firstly, we observe a close agreement between the MVN correla-  
 375 tion and the stochastic simulations, which suggests that our use of the MVN moment  
 376 closure approximation is justified. Secondly, there is little difference between the MVN correla-  
 377 tion and our approximation (that is,  $\Delta_H$  and  $\Delta_L$  are small), and so our approximation  
 378 is reasonable.

### 379 3.4 Comparison of networks

380 We now compare our approximations to the correlation between the number of infected  
 381 individuals in adjacent subpopulations for all three networks (Figure 10). All networks are  
 382 chosen to have the same  $k$  external connections: the complete network with  $P = k + 1$   
 383 populations, the  $k$ -regular tree network, and the star network with  $P = k + 1$  populations.  
 384 We observe that the correlation is highest in the complete network and lowest in the tree  
 385 network. Moreover, the difference between the approximations increases as  $k$  increases.

386 We attribute this behaviour to the total number of neighbour subpopulations that the  
 387 two focal subpopulations have, how many of those neighbours are common neighbours,  
 388 and whether these common neighbours interact. As the total number of neighbours of  
 389 each member of the focal pair increases then the correlation decreases; for a given total  
 390 number of neighbours the correlation is higher when more of these neighbours are common  
 391 between the two focal subpopulations, and is higher yet when these common neighbours  
 392 also interact with each other.

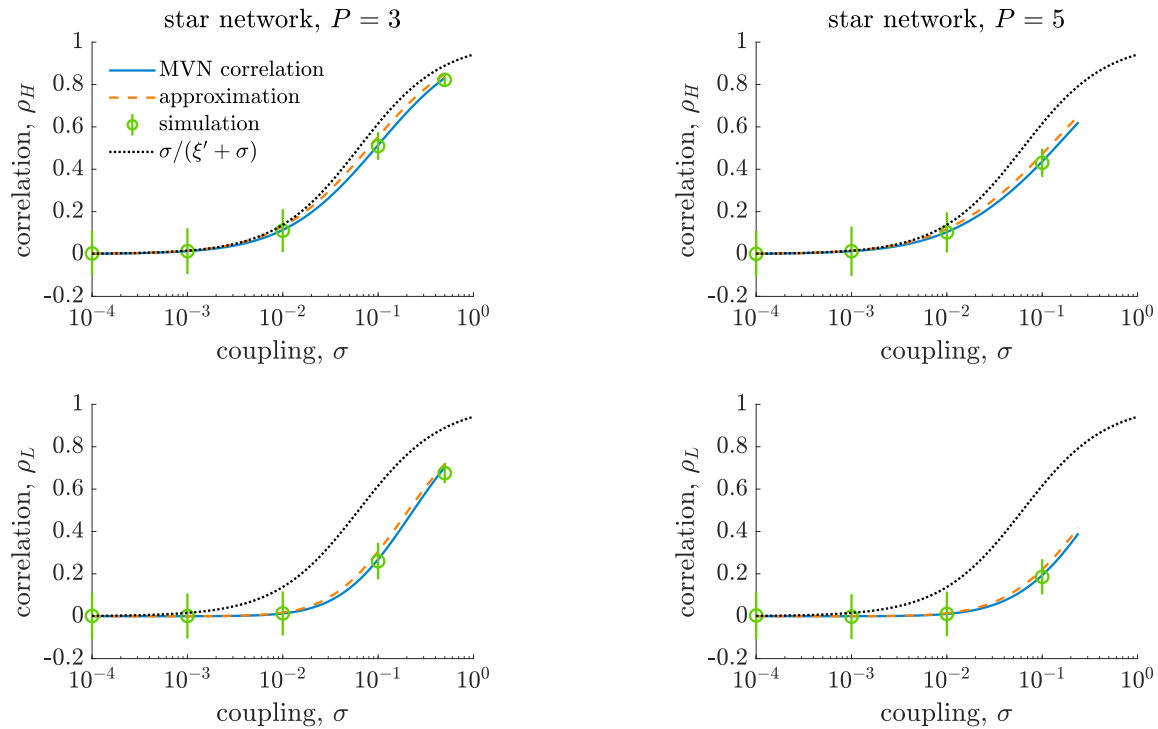

**Figure 9.** Comparing the analytic correlation,  $\rho_H$  and  $\rho_L$ , and our approximation to stochastic simulations for a measles-like endemic disease in the UK in  $P + 1$  populations arranged on the star network ( $N = 10^5$ ,  $\mu = 5.5 \times 10^{-5}$ ,  $\beta = 17/13$ ,  $\epsilon = 5.5 \times 10^{-5}$ ,  $\gamma = 1/13$ ). The between-population coupling is fixed as  $\sigma \in [0, 1]$  and within-population coupling is therefore  $1 - \sigma$  in the hub population and  $1 - \sigma$  in any leaf population. The stochastic process is simulated over a 200 year period using the Gillespie algorithm, with a burn-in period of 50 years, and generate 1000 realisations of the process for each value of  $\sigma$ . The correlation is calculated as a time-weighted Pearson correlation coefficient for  $50 \leq t \leq 200$ ; error bars represent  $\pm 2$  standard deviations.

393 For a given  $k$ , two focal subpopulations in the complete network and the star network  
 394 both have a total of  $k-1$  subpopulations. In the star network, none of these subpopulations  
 395 are common neighbours of the two focal subpopulations; however, in the complete network,  
 396 all these subpopulations are common neighbours and all the common neighbours interact  
 397 with each other, hence the correlation in the star network is lower than in the complete  
 398 network. For the same  $k$ , two focal subpopulations in the  $k$ -regular tree network have twice  
 399 the total number of neighbours compared to the star network and none of these neighbours  
 400 are common neighbours for either network. As a result, the correlation is lower in the tree  
 network than in the star network.

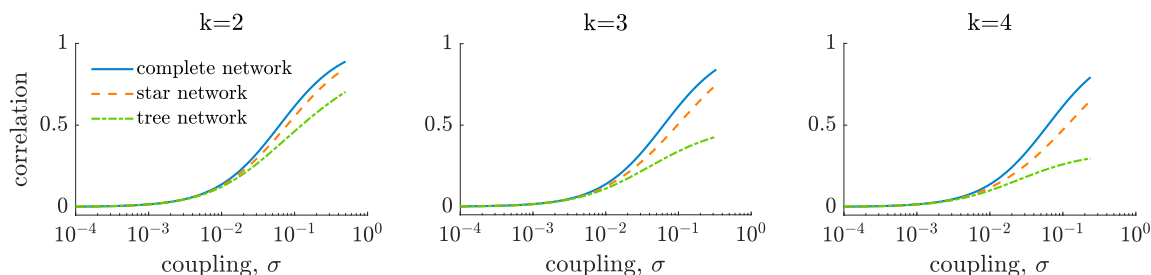

**Figure 10.** Comparison of our approximation to the correlation between a pair of adjacent populations in the complete network with  $P = k + 1$  populations, the  $k$ -regular tree network and the star network with  $P = k + 1$  populations.

401

## 402 4 Discussion

403 A limitation of metapopulation models in epidemiological modelling is now to infer the  
 404 coupling between subpopulations: existing models to not accurately describe human mo-  
 405 bility in developing countries, such as Sub-Saharan Africa, and sufficiently detailed data on  
 406 human mobility are often lacking. We propose that data on disease incidence can be used  
 407 to infer the underlying coupling from observed correlations between subpopulations. We  
 408 derive an approximation for the correlation  $\rho$  between the number of infected individuals in  
 409 a given pair of subpopulations in certain network structures as a function of the coupling  
 410 parameter  $\sigma$ . This provides a one-to-one mapping between the observable correlation  $\rho$   
 411 and the unknown coupling  $\sigma$ .

412 Our results extend the analysis of Meakin and Keeling (2018) from a simple two-  
 413 population system to multiple populations arranged on a complete network, a  $k$ -regular  
 414 tree network and a star network. Although we consider highly symmetric metapopulation  
 415 networks, increased network complexity significantly reduces the analytic tractability of  
 416 the model, compared to the two-population system. An alternative analytic relationship  
 417 between the coupling and correlation has previously been derived for more general networks

418 (Rozhnova et al., 2012); however, we believe that our results provide greater intuition and  
419 analytical traction.

420 In addition, these results improve our understanding of how metapopulation network  
421 structure affects endemic disease dynamics in the metapopulation as a whole, complement-  
422 ing existing research on epidemic diseases in metapopulation networks (Barthélemy et al.,  
423 2010; Lahodny and Allen, 2013; Wang and Wu, 2018; Yan et al., 2018). We find that  
424 network distance between subpopulations and network structure are key drivers of the  
425 correlation, although, surprisingly, in the complete network the correlation between any  
426 pair of subpopulations is independent of the total number of subpopulations. We hypoth-  
427 esise that the correlation between two given subpopulations is driven by the the number  
428 of neighbour subpopulations they both have, how many of these neighbours are shared  
429 between both subpopulations, and interactions between the neighbours.

430 Our research currently considers the mathematically tractable case of multiple identi-  
431 cal populations on highly symmetric metapopulation networks. A natural extension of the  
432 our current results would be to allow heterogeneity in the transmission parameter  $\beta$ , or  
433 population size, although we have previously showed that heterogeneous population sizes  
434 significantly impact the tractability of the results (Meakin and Keeling, 2018). In addition,  
435 the simple network structures we consider here do not fully capture the observed character-  
436 istics of real-world spatial networks, such as heterogeneous population size, degree or edge  
437 weight (Guimerà et al., 2005; Colizza et al., 2006). We propose conducting a simulation-  
438 based study to examine in depth how the correlation between two focal subpopulations  
439 is affected by their neighbours, their neighbours' neighbours and possible interactions be-  
440 tween neighbours. This will allow us to elucidate which are the most important drivers of  
441 network correlations and overall endemic disease dynamics. A final limitation is that very  
442 few diseases are captured by the simple *SIR* compartmental model; however, it would be  
443 straightforward to extend the results presented here to more realistic models.

444 Our results provide a method by which the coupling can be estimated from the corre-  
445 lation between the number of infected individuals in two populations using data on disease  
446 incidence, allowing us to estimate the coupling between subpopulations even in the absence  
447 of mobility data. Our results also offer insight into the effect of metapopulation structure  
448 on endemic disease dynamics,

## 449 5 Conclusion

450 A limitation of metapopulation models in epidemiological modelling is now to infer the cou-  
451 pling between subpopulations. In this paper we relate the correlation between the number  
452 of infected individuals in two populations as a function of the coupling, considering sys-  
453 tems of multiple identical interacting populations on highly-symmetric complex networks.  
454 Our results provide insight into the effect of metapopulation network structure on endemic  
455 disease dynamics and, used in combination with disease prevalence data, provide a method

456 by which the coupling between populations can be estimated.

457 **Author's contributions** M.J.K. developed the initial concepts. S.R.M. performed the  
458 detailed mathematical analysis. Both authors played a role in writing and editing the  
459 manuscript.

460 **Competing interests:** We have no competing interests.

461 **Funding:** This research was funded by the Engineering and Physical Sciences Research  
462 Council and the Medical Research Council through the MathSys CDT [grant number  
463 EP/L015374/1].

## 464 References

- 465 R. M. Anderson and R. May. *Infectious Diseases of Humans: Dynamics and Control*. Oxford University  
466 Press, Oxford, UK, 1992.
- 467 M. Baguelin, A. J. V. Hoek, M. Jit, S. Flasche, P. J. White, and W. J. Edmunds. Vaccination against  
468 pandemic influenza A/H1N1v in England: A real-time economic evaluation. *Vaccine*, 28(12):2370–2384,  
469 2010. ISSN 0264410X. doi: 10.1016/j.vaccine.2010.01.002.
- 470 D. Balcan, V. Colizza, B. Gonçalves, H. Hu, J. J. Ramasco, and A. Vespignani. Multiscale mobility networks  
471 and the spatial spreading of infectious diseases. *Proceedings of the National Academy of Sciences*, 106  
472 (51):21484–21489, 2009.
- 473 F. Ball, T. Britton, T. House, V. Isham, D. Mollison, L. Pellis, and G. Scalia Tomba. Seven challenges  
474 for metapopulation models of epidemics, including households models. *Epidemics*, 10:63–67, 2014. ISSN  
475 18780067. doi: 10.1016/j.epidem.2014.08.001.
- 476 M. Barthélemy, C. Godreche, and J.-M. Luck. Fluctuation effects in metapopulation models: Per-  
477 colation and pandemic threshold. *Journal of Theoretical Biology*, pages 554–564, 2010. doi:  
478 10.1016/j.jtbi.2010.09.015.
- 479 B. M. Bolker. Chaos and complexity in measles models: a comparative numerical study. *IMA Jour-  
480 nal of Mathematics Applied in Medicine and Biology*, 10(2):83–95, 1993. ISSN 14778599. doi:  
481 10.1093/imammb/10.2.83.
- 482 R. M. Christley, G. L. Pinchbeck, R. G. Bowers, D. Clancy, N. P. French, and R. Bennett. Infection in social  
483 networks: using network analysis to identify high-risk individuals. *American Journal of Epidemiology*,  
484 162(10):1024–1031, 2005. doi: 10.1093/aje/kwi308.
- 485 V. Colizza, A. Barrat, M. Barthélemy, and A. Vespignani. The role of the airline transportation network in  
486 the prediction and predictability of global epidemics. *Proceedings of the National Academy of Sciences*,  
487 103(7):2015–2020, 2006. ISSN 0027-8424. doi: 10.1073/pnas.0510525103.
- 488 S. Datta, C. H. Mercer, and M. J. Keeling. Capturing sexual contact patterns in modelling the spread of  
489 sexually transmitted infections: Evidence using Natsal-3. *PLoS ONE*, 13(11), 2018. ISSN 19326203. doi:  
490 10.1371/journal.pone.0206501.



- 491 D. J. D. Earn, P. Rohani, B. T. Grenfell, and B. M. Bolker. A simple model for complex dynamical  
492 transitions in epidemics. *Science*, 287(5453):667–670, 2000.
- 493 S. Erlander and N. F. Stewart. *The Gravity Model in Transportation Analysis – Theory and Extensions*.  
494 1990.
- 495 M. E. Gilpin and I. A. Hanski, editors. *Metapopulation Dynamics: Empirical and Theoretical Investigations*.  
496 Academic Press, 1991.
- 497 B. T. Grenfell and B. M. Bolker. Spatial heterogeneity, nonlinear dynamics and chaos in infectious diseases.  
498 *Statistical Methods in Medical Research*, 4(2):160–183, 1995.
- 499 B. T. Grenfell and B. M. Bolker. Cities and villages: infection hierarchies in a measles metapopulation.  
500 *Ecology letters*, (1):63–70, 1998.
- 501 B. T. Grenfell and J. Harwood. (Meta)population dynamics of infectious diseases. *Trends in Ecology &*  
502 *Evolution*, 12(10):395–399, 1997. ISSN 01695347. doi: 10.1016/S0169-5347(97)01174-9.
- 503 R. Guimerà, S. Mossa, A. Turttschi, L. A. N. Amaral, and K. W. Wachter. The worldwide air transportation  
504 network: Anomalous centrality, community structure, and cities’ global roles. Technical report, 2005.
- 505 T. J. Hagenaars, C. A. Donnelly, and N. M. Ferguson. Spatial heterogeneity and the persistence of infectious  
506 diseases. *Journal of Theoretical Biology*, 229:349–359, 2004. doi: 10.1016/j.jtbi.2004.04.002.
- 507 I. A. Hanski. Metapopulation dynamics. *Nature*, 396:41–49, 1998.
- 508 I. A. Hanski and O. E. Gaggiotti, editors. *Ecology, Genetics, and Evolution of Metapopulations*. Academic  
509 Press, 2004.
- 510 C. Kang, Y. Liu, D. Guo, and K. Qin. A generalized radiation model for human mobility: Spatial scale,  
511 searching direction and trip constraint. *PLoS ONE*, 10(11), 2015. ISSN 19326203. doi: 10.1371/jour-  
512 nal.pone.0143500.
- 513 M. J. Keeling. Evolutionary trade-offs at two time-scales: competition versus persistence. *Proceedings of*  
514 *the Royal Society of London B: Biological Sciences*, 267(1441):385–391, 2000.
- 515 M. J. Keeling and B. T. Grenfell. Disease extinction and community size: modeling the persistence of  
516 measles. *Science*, 275(5296):65–67, 1997.
- 517 M. J. Keeling and P. Rohani. Estimating spatial coupling in epidemiological systems: a mechanistic ap-  
518 proach. *Ecology Letters*, 5(1):20–29, 2002. ISSN 1461023X. doi: 10.1046/j.1461-0248.2002.00268.x.
- 519 M. J. Keeling and P. Rohani. *Modelling Infectious Diseases in Humans and Animals*. Princeton University  
520 Press, 2008.
- 521 M. J. Keeling and P. J. White. Targeting vaccination against novel infections: risk, age and spatial structure  
522 for pandemic influenza in Great Britain. *Journal of The Royal Society Interface*, 8(58):661–670, 2010.  
523 ISSN 1742-5689. doi: 10.1098/rsif.2010.0474.
- 524 M. U. G. Kraemer, N. R. Faria, R. C. Reiner, N. Golding, E. O. Nsoesie, O. Faye, T. de Oliveira, S. Stasse,  
525 R. N. Thompson, D. L. Smith, S. Cauchemez, H. Salje, S. C. Hill, D. Bisanzio, M. A. Johansson,  
526 H. H. Nax, J. S. Brownstein, A. J. Tatem, M. Niedrig, B. S. R. Pradelski, N. Taveira, G. R. W. Wint,  
527 A. A. Sall, B. Nikolay, N. R. Murphy, O. G. Pybus, F. M. Shearer, S. I. Hay, K. Khan, and I. I.

- 528 Bogoch. Spread of yellow fever virus outbreak in Angola and the Democratic Republic of the Congo  
529 201516: a modelling study. *The Lancet Infectious Diseases*, 17(3):330–338, 2016. ISSN 14733099. doi:  
530 10.1016/s1473-3099(16)30513-8.
- 531 G. E. Lahodny and L. J. Allen. Probability of a Disease Outbreak in Stochastic Multipatch Epidemic  
532 Models. *Bulletin of Mathematical Biology*, 75(7):1157–1180, 2013. ISSN 00928240. doi: 10.1007/s11538-  
533 013-9848-z.
- 534 A. L. Lloyd. Estimating variability in models for recurrent epidemics: assessing the use of mo-  
535 ment closure techniques. *Theoretical Population Biology*, 65(1):49–65, 2004. ISSN 00405809. doi:  
536 10.1016/j.tpb.2003.07.002.
- 537 S. R. Meakin and M. J. Keeling. Correlations between stochastic epidemics in two interacting populations.  
538 *Epidemics*, pages 1–0, 2018. ISSN 18780067. doi: 10.1016/j.epidem.2018.08.005.
- 539 L. F. Olsen and W. M. Schaffer. Chaos versus noisy periodicity: alternative hypotheses for childhood  
540 epidemics. *Science*, 249(4968):499–504, 1990. doi: 10.1126/science.2382131.
- 541 K. S. Rock, M. L. Ndeffo-Mbah, S. Castaño, C. Palmer, A. Pandey, K. E. Atkins, J. M. Ndung’U, T. D.  
542 Hollingsworth, A. Galvani, C. Bever, N. Chitnis, and M. J. Keeling. Assessing strategies against gambi-  
543 ense sleeping sickness through mathematical modeling. *Clinical Infectious Diseases*, 66:S286–S292, 2018.  
544 ISSN 15376591. doi: 10.1093/cid/ciy018.
- 545 P. Rohani, M. J. Keeling, and B. T. Grenfell. The interplay between determinism and stochasticity in child-  
546 hood diseases. *The American Naturalist*, 159(5):469–481, 2002. ISSN 0003-0147. doi: 10.1086/339467.
- 547 G. Rozhnova, A. Nunes, and A. J. Mckane. Phase lag in epidemics on a network of cities. *Physical Review*  
548 *E*, 85(5):051912, 2012. doi: 10.1103/PhysRevE.85.051912.
- 549 D. Schenzle. An age-structured model of pre- and post-vaccination measles transmission. *Mathematical*  
550 *Medicine and Biology: A Journal of the IMA*, 1(2):169–191, 1984.
- 551 F. Simini, M. C. González, A. Maritan, and A. L. Barabási. A universal model for mobility and migration  
552 patterns. *Nature*, 484(7392):96–100, 2012. ISSN 00280836. doi: 10.1038/nature10856.
- 553 M. Tizzoni, P. Bajardi, A. Decuyper, G. Kon, K. King, and C. M. Schneider. On the use of human  
554 mobility proxies for modeling epidemics. *PLoS Computational Biology*, 10(7), 2014. doi: 10.1371/jour-  
555 nal.pcbi.1003716.
- 556 C. Viboud, O. N. Bjørnstad, D. L. Smith, L. Simonsen, M. A. Miller, and B. T. Grenfell. Synchrony, waves,  
557 and spatial hierarchies in the spread of influenza. *Science*, 312(5772):447–51, 2006. ISSN 1095-9203. doi:  
558 10.1126/science.1125237.
- 559 J. Wallinga, M. van Boven, and M. Lipsitch. Optimizing infectious disease interventions during an emerging  
560 epidemic. *Proceedings of the National Academy of Sciences*, 107(2):923–928, jan 2010.
- 561 L. Wang and J. T. Wu. Characterizing the dynamics underlying global spread of epidemics. *Nature*  
562 *Communications*, 9(1), 2018. ISSN 20411723. doi: 10.1038/s41467-017-02344-z.
- 563 A. Wesolowski, W. P. O’Meara, N. Eagle, A. J. Tatem, and C. O. Buckee. Evaluating Spatial Interaction  
564 Models for Regional Mobility in Sub-Saharan Africa. *PLoS Computational Biology*, 11(7):1004267, 2015.  
565 ISSN 15537358. doi: 10.1371/journal.pcbi.1004267.

- 566 P. Whittle. On the use of the normal approximation in the treatment of stochastic processes. *Journal of*  
567 *the Royal Statistical Society. Series B (Methodological)*, 19(2):268–281, 1957.
- 568 Y. Xia, O. N. Bjørnstad, and B. T. Grenfell. Measles metapopulation dynamics: a gravity model for epidemi-  
569 ological coupling and dynamics. *The American Naturalist*, 164(2):267–281, 2004. doi: 10.1086/422341.
- 570 A. W. Yan, A. J. Black, J. M. McCaw, N. Rebuli, J. V. Ross, A. J. Swan, and R. I. Hickson. The distribution  
571 of the time taken for an epidemic to spread between two communities. *Mathematical Biosciences*, 303:  
572 139–147, jul 2018. ISSN 18793134. doi: 10.1016/j.mbs.2018.07.004.
- 573 X. Y. Yan, C. Zhao, Y. Fan, Z. Di, and W. X. Wang. Universal predictability of mobility patterns in cities.  
574 *Journal of the Royal Society Interface*, 11(100), 2014. ISSN 17425662. doi: 10.1098/rsif.2014.0834.
